# Supplementary material for: Response Predictive Markers and Synergistic Agents for Drug Repositioning of Statins in Ovarian Cancer
Source: MDPI journal article supplement (doi:10.3390/ph15020124), 2022-01-21
Supplement: s1 [file s1]

**Table S1**

Regulatory genes affected by simvastatin compared with those affected by L-778123 in OVSAHO and KURAMOCHI cells.

| No                          | Gene Symbol       | Fold change                                           |                                                              |
|-----------------------------|-------------------|-------------------------------------------------------|--------------------------------------------------------------|
|                             |                   | OVSAHO_Simvastatin<br>compared with<br>OVSAHO_L778123 | OVSAHO_Simvastatin<br>compared with<br>KURAMOCHI_Simvastatin |
| Top 10 up-regulated genes   |                   |                                                       |                                                              |
| 1                           | <i>PIK3IP1</i>    | 10.94                                                 | 1.00                                                         |
| 2                           | <i>BMF</i>        | 7.41                                                  | 0.955                                                        |
| 3                           | <i>MGP</i>        | 5.88                                                  | 0.807                                                        |
| 4                           | <i>ERVH-3</i>     | 5.82                                                  | 1.08                                                         |
| 5                           | <i>RARA-AS1</i>   | 5.79                                                  | 1.04                                                         |
| 6                           | <i>PRSS57</i>     | 4.68                                                  | 0.819                                                        |
| 7                           | <i>HMGCS2</i>     | 4.65                                                  | 1.18                                                         |
| 8                           | <i>SEMA6D</i>     | 3.86                                                  | 1.04                                                         |
| 9                           | <i>N4BP2L1</i>    | 3.67                                                  | 0.919                                                        |
| 10                          | <i>EMP3</i>       | 3.62                                                  | 0.918                                                        |
| Top 10 down-regulated genes |                   |                                                       |                                                              |
| 1                           | <i>GSTA9P</i>     | 0.0914                                                | 1.12                                                         |
| 2                           | <i>MID1</i>       | 0.113                                                 | 1.18                                                         |
| 3                           | <i>ERVMER34-1</i> | 0.120                                                 | 0.903                                                        |
| 4                           | <i>ZG16</i>       | 0.154                                                 | 1.15                                                         |
| 5                           | <i>RABGEF1</i>    | 0.158                                                 | 1.06                                                         |
| 6                           | <i>WDR62</i>      | 0.175                                                 | 0.905                                                        |
| 7                           | <i>E2F7</i>       | 0.179                                                 | 1.05                                                         |

|    |                |       |       |
|----|----------------|-------|-------|
| 8  | <i>SGO1</i>    | 0.194 | 0.828 |
| 9  | <i>HELLS</i>   | 0.203 | 1.06  |
| 10 | <i>SNAR-G1</i> | 0.203 | 1.16  |

---
