# Supplementary material for: Response Predictive Markers and Synergistic Agents for Drug Repositioning of Statins in Ovarian Cancer
Source: MDPI journal article supplement (doi:10.3390/ph15020124), 2022-01-21
Supplement: s1 [file s1]

**Table S2.** Gene ontology (GO) processes regulated by simvastatin in OVSAHO and KURAMOCHI cells.

| GO Terms                                      | GO ID   | Genes in category | Genes in list | p-value   |
|-----------------------------------------------|---------|-------------------|---------------|-----------|
| <b>UP</b>                                     |         |                   |               |           |
| Biological Process*                           |         |                   |               |           |
| cell cycle                                    | 7049    | 2748              | 113           | 2.76.E-27 |
| cell cycle process                            | 22402   | 2011              | 95            | 6.20.E-27 |
| mitotic cell cycle process                    | 1903047 | 1245              | 72            | 3.25.E-25 |
| chromosome segregation                        | 7059    | 536               | 47            | 7.39.E-24 |
| mitotic cell cycle                            | 278     | 1478              | 76            | 1.73.E-23 |
| DNA replication                               | 6260    | 426               | 39            | 1.40.E-20 |
| chromosome organization                       | 51276   | 1806              | 78            | 1.62.E-19 |
| nuclear chromosome segregation                | 98813   | 465               | 39            | 3.08.E-19 |
| sister chromatid segregation                  | 819     | 364               | 34            | 2.49.E-18 |
| cell cycle phase transition                   | 44770   | 853               | 50            | 9.10.E-18 |
| Cellular component*                           |         |                   |               |           |
| chromosome                                    | 5694    | 1485              | 78            | 7.61.E-25 |
| chromosomal part                              | 44427   | 1273              | 70            | 2.28.E-23 |
| condensed chromosome                          | 793     | 331               | 32            | 7.57.E-18 |
| chromosomal region                            | 98687   | 519               | 39            | 1.07.E-17 |
| chromosome, centromeric region                | 775     | 298               | 29            | 2.35.E-16 |
| non-membrane-bounded organelle                | 43228   | 6203              | 150           | 5.10.E-14 |
| intracellular non-membrane-bounded organelle  | 43232   | 6203              | 150           | 5.10.E-14 |
| condensed chromosome, centromeric region      | 779     | 175               | 21            | 5.60.E-14 |
| kinetochore                                   | 776     | 202               | 22            | 1.05.E-13 |
| condensed chromosome kinetochore              | 777     | 154               | 19            | 5.46.E-13 |
| Molecular Function                            |         |                   |               |           |
| catalytic activity, acting on DNA             | 140097  | 270               | 20            | 1.34.E-09 |
| actin binding                                 | 3779    | 666               | 31            | 4.28.E-09 |
| cytoskeletal protein binding                  | 8092    | 1395              | 48            | 5.03.E-09 |
| DNA helicase activity                         | 3678    | 75                | 9             | 9.22.E-07 |
| helicase activity                             | 4386    | 216               | 13            | 1.05.E-05 |
| structural constituent of muscle              | 8307    | 80                | 8             | 1.48.E-05 |
| single-stranded DNA binding                   | 3697    | 165               | 11            | 1.96.E-05 |
| actin filament binding                        | 51015   | 265               | 14            | 2.11.E-05 |
| single-stranded DNA-dependent ATPase activity | 43142   | 14                | 4             | 3.20.E-05 |
| DNA-dependent ATPase activity                 | 8094    | 119               | 9             | 4.18.E-05 |
| <b>Down</b>                                   |         |                   |               |           |

|                                                                  |         |      |    |           |
|------------------------------------------------------------------|---------|------|----|-----------|
| Biological Process*                                              |         |      |    |           |
| positive regulation of release of cytochrome c from mitochondria | 90200   | 47   | 8  | 1.14E-08  |
| apoptotic signaling pathway                                      | 97190   | 866  | 27 | 4.26E-08  |
| cell aggregation                                                 | 98743   | 28   | 6  | 1.93E-07  |
| regulation of release of cytochrome c from mitochondria          | 90199   | 74   | 8  | 4.42E-07  |
| regulation of apoptotic signaling pathway                        | 2001233 | 556  | 19 | 1.26E-06  |
| release of cytochrome c from mitochondria                        | 1836    | 89   | 8  | 1.84E-06  |
| positive regulation of apoptotic signaling pathway               | 2001235 | 269  | 13 | 1.58E-06  |
| cartilage condensation                                           | 1502    | 26   | 5  | 3.74E-06  |
| circulatory system process                                       | 3013    | 752  | 21 | 8.17E-06  |
| blood circulation                                                | 8015    | 748  | 21 | 7.53E-06  |
| Cellular component                                               |         |      |    |           |
| integral component of plasma membrane                            | 5887    | 2245 | 40 | 5.25.E-05 |
| extracellular space                                              | 5615    | 5099 | 73 | 5.53.E-05 |
| intrinsic component of plasma membrane                           | 31226   | 2332 | 41 | 5.63.E-05 |
| extracellular region                                             | 5576    | 6459 | 87 | 7.42.E-05 |
| extracellular region part                                        | 44421   | 5438 | 76 | 8.22.E-05 |
| integrin alpha11b-beta3 complex                                  | 70442   | 2    | 2  | 8.65.E-05 |
| ciliary neurotrophic factor receptor complex                     | 70110   | 10   | 3  | 9.15.E-05 |
| plasma membrane part                                             | 44459   | 3838 | 58 | 1.01.E-04 |
| Molecular Function                                               |         |      |    |           |
| spermidine binding                                               | 19809   | 5    | 3  | 7.86.E-06 |
| diamine N-acetyltransferase activity                             | 4145    | 6    | 3  | 1.56.E-05 |

\* Omitted from the top 10
